# Supplementary material
Source: ML conference proceedings conference paper supplement (https://proceedings.mlr.press/v28/xiang13.html)
Supplement: Supplementary file 1 [file xiang13-supp.pdf]

Supplementary Material for paper:  
Efficient Sparse Group Feature Selection via  
Nonconvex Optimization

### A. Proof of Theorem 3

The proof uses a large deviation probability inequality of (Wong & Shen, 1995) to treat one-sided log-likelihood ratios with constraints.

Let  $\mathcal{S} = \{\mathbf{x}^\tau : \|\mathbf{x}^\tau\|_0 \leq s_1^0, \|\mathbf{x}^\tau\|_{0,G} \leq s_2^0\}$ ,  $\|\mathbf{x}\|_0 = \sum_{j=1}^p I(|x_j| \neq 0)$  is the  $L_0$ -norm of  $\mathbf{x}$ , and  $\|\mathbf{x}\|_{0,G} = \sum_{j=1}^{|G|} I(\|\mathbf{x}_j\|_2 \neq 0)$  is the  $L_0$ -norm over the groups. Now we partition  $\mathcal{S}$ . Note that for  $C \subset (G_1, \dots, G_{|G|})$ , it can be partitioned into  $C = (C \setminus C^0) \cup (C \cap C^0)$ . Then

$$\mathcal{S} = \bigcup_{i=0}^{s_2^0} \bigcup_{C \in \mathcal{B}_i} \mathcal{S}_{A_C, C},$$

where  $\mathcal{S}_{A_C, C} = \{\mathbf{x}^\tau \in \mathcal{S} : C(\mathbf{x}) = C = (G_{i_1}, \dots, G_{i_k}), \sum_j |A_{G_j}| \leq s_1^0\}$ , and  $\mathcal{B}_i = \{C \neq C_0 : |C^0 \setminus C| = i, |C| \leq s_2^0\}$ , with  $|\mathcal{B}_i| = \binom{s_2^0}{s_2^0 - i} \sum_{j=0}^i \binom{|G| - s_2^0}{j}$ ;  $i = 0, \dots, s_2^0$ .

To bound the error probability, let  $L(\mathbf{x}) = -\frac{1}{2} \|\mathbf{A}\mathbf{x} - \mathbf{y}\|^2$  be the likelihood. Note that

$$\{\hat{\mathbf{x}} \neq \hat{\mathbf{x}}^o\} \subseteq \{L(\hat{\mathbf{x}}) - L(\hat{\mathbf{x}}^o) \geq 0\} \subseteq \{L(\hat{\mathbf{x}}) - L(\mathbf{x}^0) \geq 0\}.$$

This together with  $\{\hat{\mathbf{x}} \neq \hat{\mathbf{x}}^o\} \subseteq \{\hat{\mathbf{x}} \in \mathcal{S}\}$  implies that

$$\{\hat{\mathbf{x}} \neq \hat{\mathbf{x}}^o\} \subseteq \{L(\hat{\mathbf{x}}) - L(\mathbf{x}^0) \geq 0\} \cap \{\hat{\mathbf{x}} \in \mathcal{S}\}.$$

Consequently,

$$\begin{aligned} I &\equiv P(\hat{\mathbf{x}} \neq \hat{\mathbf{x}}^o) \\ &\leq P(L(\hat{\mathbf{x}}) - L(\mathbf{x}^0) \geq 0; \hat{\mathbf{x}} \in \mathcal{S}) \\ &\leq \sum_{i=1}^{s_2^0} \sum_{C \in \mathcal{B}_i} \sum_{\mathbf{x} \in \mathcal{S}_{A_C, C}} P^* \left( \sup_{\mathbf{x} \in \mathcal{S}_{A_C, C}} (L(\mathbf{x}) - L(\mathbf{x}^0)) \geq 0 \right) \\ &\leq \sum_{i=1}^{s_2^0} \sum_{j=1}^{s_1^0} \sum_{|C|=i, |A_{G_j}|=j} P^* \left( \sup_{\{-\log(1-h^2(\mathbf{x}, \mathbf{x}^0)) \geq \max(i, 1)C_{\min}(\mathbf{x}^0) - d_3 \tau^{d_2} p, \mathbf{x} \in \mathcal{S}_{A_C, C}\}} (L(\mathbf{x}) - L(\mathbf{x}^0)) \geq 0 \right), \end{aligned}$$

where  $P^*$  is the outer measure and the last two inequalities use the fact that  $\mathcal{S}_{A_C, C} \subseteq \{\mathbf{x} \in \mathcal{S}_{A_C, C} : \max(|C^0 \setminus C|, 1)C_{\min}(\mathbf{x}^0) \leq -\log(1-h^2(\mathbf{x}, \mathbf{x}^0))\} \subseteq \{-\log(1-h^2(\mathbf{x}, \mathbf{x}^0)) \geq d_1 \max(i, 1)C_{\min}(\mathbf{x}^0) - d_3 \tau^{d_2} p\}$ , under Assumption 3.

For  $I$ , we apply Theorem 1 of (Wong & Shen, 1995) to bound each term. Towards this end, we verify their entropy condition (3.1) for the local entropy over  $\mathcal{S}_{A_C, C}$  for  $|C| = 1, \dots, s_2^0$  and  $|A| = 1, \dots, s_1^0$ . Under Assumption 2  $\varepsilon = \varepsilon_{n,p} = (2c_0)^{1/2} c_4^{-1} \log(2^{1/2}/c_3) \log p (\frac{s_1^0}{n})^{1/2}$  satisfies there with respect to  $\varepsilon > 0$ , that is,

$$\sup_{\{0 \leq |A| \leq p_0\}} \int_{2^{-8\varepsilon^2}}^{2^{1/2}\varepsilon} H^{1/2}(t/c_3, \mathcal{F}_{ji}) dt \leq p_0^{1/2} 2^{1/2} \varepsilon \log(2/2^{1/2} c_3) \leq c_4 n^{1/2} \varepsilon^2. \quad (16)$$

for some constant  $c_3 > 0$  and  $c_4 > 0$ , say  $c_3 = 10$  and  $c_4 = \frac{(2/3)^{5/2}}{512}$ . By Assumption 2,  $C_{\min}(\mathbf{x}^0) \geq \varepsilon_{n,p_0}^2$  implies (16), provided that  $s_1^0 \geq (2c_0)^{1/2} c_4^{-1} \log(2^{1/2}/c_3)$ .

Note that  $|\mathcal{B}_i| = \binom{s_2^0}{s_2^0 - i} \sum_{j=0}^i \binom{|G| - s_2^0}{j} \leq (|G|(|G| - s_2^0))^i \leq (|G|^2/4)^i$  by the binomial coefficients formula. Moreover,  $\sum_{j=1}^{s_1^0} 2^j j^i \leq i^i s_1^0$ , and  $\sum_{j_1 + \dots + j_i = j} \binom{j}{j_1, \dots, j_i} 2^j = (2i)^j$  using the Multinomial Theorem. By Theorem 1 of (Wong & Shen,

1995), there exists a constant  $c_2 > 0$ , say  $c_2 = \frac{4}{27} \frac{1}{1926}$ ,

$$\begin{aligned} I &\leq \sum_{i=1}^{s_2^0} |\mathcal{B}_i| \sum_{j=1}^{s_1^0} \sum_{(j_1, \dots, j_i)} \binom{j}{j_1, \dots, j_i} 2^{j_1} \dots 2^{j_i} \exp(-c_2 n i C_{\min}(\mathbf{x}^0)) \\ &\leq \sum_{i=1}^{s_2^0} \exp(-c_2 n i C_{\min}(\mathbf{x}^0) + 2i(\log |G| + \log s_1^0)) \\ &\leq \exp(-c_2 n C_{\min}(\mathbf{x}^0) + 2(\log |G| + \log s_1^0)). \end{aligned}$$

Let  $G = \{\hat{\mathbf{x}} \neq \hat{\mathbf{x}}^0\}$ . For the risk property,  $Eh^2(\hat{\mathbf{x}}, \mathbf{x}^0) = Eh^2(\hat{\mathbf{x}}^0, \mathbf{x}^0) + Eh^2(\hat{\mathbf{x}}, \mathbf{x}^0)I(G)$  is upper bounded by

$$Eh^2(\hat{\mathbf{x}}, \mathbf{x}^0) + \exp(-c_2 n C_{\min}(\mathbf{x}^0) + 2(\log |G| + \log s_1^0)) = (1 + o(1))Eh^2(\hat{\mathbf{x}}^0, \mathbf{x}^0),$$

using the fact that  $h(\hat{\mathbf{x}}, \mathbf{x}^0) \leq 1$ . This completes the proof.

## B. Accelerated Gradient Method

The AGM procedure is listed in Algorithms 3, in which  $f(\mathbf{x})$  is the objective function  $\frac{1}{2}\|\mathbf{A}\mathbf{x} - \mathbf{y}\|_2^2$  with  $\nabla f(\mathbf{x})$  denotes its gradient at  $\mathbf{x}$ . In addition,  $f_{L,\mathbf{u}}(\mathbf{x})$  is the linearization of  $f(\mathbf{x})$  at  $\mathbf{u}$  defined as follows:

$$f_{L,\mathbf{u}}(\mathbf{x}) = f(\mathbf{u}) + \nabla f(\mathbf{u})^T(\mathbf{x} - \mathbf{u}) + \frac{L}{2}\|\mathbf{x} - \mathbf{u}\|_2^2.$$

---

**Algorithm 3** Accelerated Gradient Method (Nesterov, 2007; Beck & Teboulle, 2009) for (7)

---

**Input:**  $\mathbf{A}$ ,  $\mathbf{y}$ ,  $s_1$ ,  $s_2$ ,  $L_0$ ,  $\mathbf{x}_0$ ,

**Output:** solution  $\mathbf{x}$  to (7)

- 1: **Initialize:**  $L_0$ ,  $\mathbf{x}_1 = \mathbf{x}_0$ ,  $\alpha_{-1} = 0$ ,  $\alpha_0 = 1$ ,  $t = 0$ .
- 2: **repeat**
- 3:    $t = t + 1$ ,  $\beta_t = \frac{\alpha_{t-2}-1}{\alpha_{t-1}}$ ,  $\mathbf{u}_t = \mathbf{x}_t + \beta_t(\mathbf{x}_t - \mathbf{x}_{t-1})$
- 4:   **Line search:** Find the smallest  $L = 2^j L_{t-1}$  such that

$$f(\mathbf{x}_{t+1}) \leq f_{L,\mathbf{u}_t}(\mathbf{x}_{t+1}),$$

where  $\mathbf{x}_{t+1} = \text{SGLP}(\mathbf{u}_t - \frac{1}{L}\nabla f(\mathbf{u}_t), s_1, s_2)$

- 5:    $\alpha_{t+1} = \frac{1 + \sqrt{1 + 4\alpha_t^2}}{2}$ ,  $L_t = L$ .
  - 6: **until** Converge
  - 7: **return**  $\mathbf{x}_t$
- 

## C. Proof of Theorem 2

We utilize an intermediate lemma from (Bonnans & Shapiro, 1998):

**Lemma 2.** *Let  $X$  be a metric space and  $U$  be a normed space. Suppose that for all  $x \in X$ , the function  $\psi(x, \cdot)$  is differentiable and that  $\psi(x, Y)$  and  $D_Y \psi(x, Y)$  (the partial derivative of  $\psi(x, Y)$  with respect to  $Y$ ) are continuous on  $X \times U$ . Let  $\Phi$  be a compact subset of  $X$ . Define the optimal value function as  $\phi(Y) = \inf_{x \in \Phi} \psi(x, Y)$ . The optimal value function  $\phi(Y)$  is directionally differentiable. In addition, if for any  $Y \in U$ ,  $\psi(\cdot, Y)$  has a unique minimizer  $x(Y)$  over  $\Phi$ , then  $\phi(Y)$  is differentiable at  $Y$  and the gradient of  $\phi(Y)$  is given by  $\phi'(Y) = D_Y \psi(x(Y), Y)$ .*

*Proof of Theorem 2.* Since both constraints are active, if  $(x, \lambda, \eta) = \text{SGLP}(v, s_1, s_2)$ , then  $x$  and  $\lambda$  are also the optimal solutions to the following problem:

$$\underset{\lambda}{\text{maximize}} \quad \underset{x \in X}{\text{minimize}} \quad \psi(x, \lambda) = \frac{1}{2}\|x - v\|_2^2 + \lambda(\|x\|_1 - s_1),$$

where  $X = \{x : \|x\|_G \leq s_2\}$ . By Lemma 2,  $\phi(\lambda) = \inf_{x \in X} \psi(x, \lambda)$  is differentiable with the derivative given by  $\|x\|_1$ . In addition, as a pointwise infimum of a concave function, so does  $\phi(\lambda)$  (Boyd & Vandenberghe, 2004) and its derivative,  $\|x\|_1$ , is non-increasing. Therefore  $s_1 = \|x\|_1$  is non-decreasing as  $\lambda$  becomes smaller. This completes the proof.  $\square$

## D. Algorithm for Solving (8)

Based on the analysis in Section 3.2, we give a detailed description of the sparse group lasso projection algorithm in Algorithm 4:

---

### Algorithm 4 Sparse Group Lasso Projection Algorithm

---

**Input:**  $\mathbf{v}$ ,  $s_1$ ,  $s_2$

**Output:** an optimal solution  $\mathbf{x}$  to the Sparse Group Projection Problem

**Function** SGLP( $\mathbf{v}$ ,  $s_1$ ,  $s_2$ )

```

1: if  $\|\mathbf{x}\|_1 \leq s_1$  and  $\|\mathbf{x}\|_G \leq s_2$  then
2:   return  $\mathbf{v}$ 
3: end if
4:  $\mathbf{x}_{C_1} = \mathcal{P}_1^{s_1}(\mathbf{v})$ 
5:  $\mathbf{x}_{C_2} = \mathcal{P}_G^{s_2}(\mathbf{v})$ 
6:  $\mathbf{x}_{C_{12}} = \text{biseq}(\mathbf{v}, s_1, s_2)$ 
7: if  $\|\mathbf{x}_{C_1}\|_G \leq s_2$  then
8:   return  $\mathbf{x}_{C_1}$ 
9: else if  $\|\mathbf{x}_{C_2}\|_1 \leq s_1$  then
10:  return  $\mathbf{x}_{C_2}$ 
11: else
12:  return  $\mathbf{x}_{C_{12}}$ 
13: end if

```

**Function** biseq( $\mathbf{v}$ ,  $s_1$ ,  $s_2$ )

```

1: Initialize  $up$ ,  $low$  and  $tol$ 
2: while  $up - low > tol$  do
3:    $\hat{\lambda} = (low + up)/2$ 
4:   if (12) has a solution  $\hat{\eta}$  given  $v^{\hat{\lambda}}$  then
5:     calculate  $\hat{s}_1$  using  $\hat{\eta}$  and  $\hat{\lambda}$ .
6:     if  $\hat{s}_1 \leq s_1$  then
7:        $up = \hat{\lambda}$ 
8:     else
9:        $low = \hat{\lambda}$ 
10:    end if
11:  else
12:     $up = \hat{\lambda}$ 
13:  end if
14: end while
15:  $\lambda^* = up$ 
16: Solve (12) to get  $\eta^*$ 
17: Calculate  $\mathbf{x}^*$  from  $\lambda^*$  and  $\eta^*$  via (10)
18: return  $\mathbf{x}^*$ 

```

---

## E. Algorithm for Solving (13)

We give a detailed description of algorithm for solving the restricted projection (13) in Algorithm 5.

## F. The ADMM Projection algorithm

Alternating Direction Method of Multipliers (ADMM) is widely chosen for its capability of decomposing coupled variables/constraints, which is exactly the case in our projection problem. Before applying ADMM, we transform (8) into an

equivalent form as follows:

$$\begin{aligned} & \underset{\mathbf{x}}{\text{minimize}} && \frac{1}{2} \|\mathbf{x} - \mathbf{v}\|_2^2 \\ & \text{subject to} && \|\mathbf{u}\|_1 \leq s_1 \\ & && \|\mathbf{w}\|_G \leq s_2 \\ & && \mathbf{u} = \mathbf{x}, \mathbf{w} = \mathbf{x}. \end{aligned}$$

The augmented Lagrangian is:

$$\mathcal{L}(\mathbf{x}, \boldsymbol{\lambda}, \boldsymbol{\eta}) = \frac{1}{2} \|\mathbf{x} - \mathbf{v}\|_2^2 + \boldsymbol{\lambda}^T (\mathbf{u} - \mathbf{x}) + \boldsymbol{\eta}^T (\mathbf{w} - \mathbf{x}) + \frac{\rho}{2} (\|\mathbf{u} - \mathbf{x}\|_2^2 + \|\mathbf{w} - \mathbf{x}\|_2^2).$$

Utilize the scaled form (Boyd et al., 2011), i.e., let  $\boldsymbol{\lambda} = \frac{\lambda}{\rho}$ ,  $\boldsymbol{\eta} = \frac{\eta}{\rho}$ , we can obtain an equivalent augmented Lagrangian:

$$\mathcal{L}(\mathbf{x}, \boldsymbol{\lambda}, \boldsymbol{\eta}) = \frac{1}{2} \|\mathbf{x} - \mathbf{v}\|_2^2 + \frac{\rho}{2} (\|\mathbf{x} - \mathbf{u} - \boldsymbol{\lambda}\|_2^2 + \|\mathbf{x} - \mathbf{w} - \boldsymbol{\eta}\|_2^2) - \frac{\rho}{2} (\|\boldsymbol{\lambda}\|_2^2 + \|\boldsymbol{\eta}\|_2^2).$$

Now we calculate the optimal  $\mathbf{x}$ ,  $\boldsymbol{\lambda}$  and  $\boldsymbol{\eta}$  through alternating minimization. For fixed  $\mathbf{u}$  and  $\mathbf{w}$ , the optimal  $\mathbf{x}$  possesses a closed-form solution:

$$\mathbf{x} = \frac{1}{1 + 2\rho} (\mathbf{v} + \rho(\mathbf{u} + \boldsymbol{\lambda} + \mathbf{w} + \boldsymbol{\eta})).$$

For fixed  $\mathbf{x}$  and  $\mathbf{u}$ , finding the optimal  $\mathbf{w}$  is a group lasso projection:

$$\begin{aligned} & \underset{\mathbf{w}}{\text{minimize}} && \frac{1}{2} \|\mathbf{w} - (\mathbf{x} - \boldsymbol{\eta})\|_2^2 \\ & \text{subject to} && \|\mathbf{w}\|_G \leq s_2 \end{aligned} \tag{17}$$

For fixed  $\mathbf{x}$  and  $\mathbf{w}$ , finding the optimal  $\mathbf{u}$  amounts to solve an  $L_1$ -ball projection:

$$\begin{aligned} & \underset{\mathbf{u}}{\text{minimize}} && \frac{1}{2} \|\mathbf{u} - (\mathbf{x} - \boldsymbol{\lambda})\|_2^2 \\ & \text{subject to} && \|\mathbf{u}\|_1 \leq s_1. \end{aligned} \tag{18}$$

The update of multipliers is standard as follows:

$$\begin{aligned} \boldsymbol{\lambda} &= \boldsymbol{\lambda} + \mathbf{u} - \mathbf{x} \\ \boldsymbol{\eta} &= \boldsymbol{\eta} + \mathbf{w} - \mathbf{x} \end{aligned} \tag{19}$$

Algorithm 6 summarizes the above procedure. Note that, the value of the penalty term  $\rho$  is fixed in Algorithm 6. However, in our implementation, we increase  $\rho$  whenever necessary to obtain faster convergence.

## G. The Dykstra's Algorithm

The Dykstra's algorithm is a general scheme to compute the projection onto intersections of convex sets. It is carried out by taking Euclidean projections onto each convex set alternatively in a smart way and is guaranteed to converge for least squares objective function (Combettes & Pesquet, 2010). The details of applying Dykstra's Algorithm to our projection problem are listed in Algorithm 7.

**Algorithm 5** Restricted Sparse Group Lasso Projection Algorithm

---

**Input:**  $\mathbf{v}$ ,  $s_1$ ,  $s_2$ ,  $T_1$ ,  $T_3$

**Output:** an optimal solution  $\mathbf{x}$  to the Restricted Sparse Group Projection Problem (13)

**Function** RSGLP( $\mathbf{v}$ ,  $s_1$ ,  $s_2$ ,  $T_1$ ,  $T_3$ )

```

1: if  $\|\mathbf{x}^{T_1}\|_1 \leq s_1$  and  $\|\mathbf{x}^{T_3}\|_G \leq s_2$  then
2:   return  $\mathbf{v}$ 
3: end if
4:  $\mathbf{x}_{C_1}^{(T_1)^c} = \mathbf{v}^{(T_1)^c}$ ,  $\mathbf{x}_{C_1}^{T_1} = \mathcal{P}_1^{s_1}(\mathbf{v}^{T_1})$ 
5:  $\mathbf{x}_{C_2}^{(T_3)^c} = \mathbf{v}^{(T_3)^c}$ ,  $\mathbf{x}_{C_2}^{T_3} = \mathcal{P}_G^{s_2}(\mathbf{v}^{T_3})$ 
6:  $\mathbf{x}_{C_{12}}^{(T_1)^c} = \mathbf{v}^{(T_1)^c}$ ,  $\mathbf{x}_{C_{12}}^{T_1} = \text{bisec}(\mathbf{v}, s_1, s_2, T_1, T_3)$ 
7: if  $\|\mathbf{x}_{C_1}^{T_3}\|_G \leq s_2$  then
8:   return  $\mathbf{x}_{C_1}$ 
9: else if  $\|\mathbf{x}_{C_2}^{T_1}\|_1 \leq s_1$  then
10:  return  $\mathbf{x}_{C_2}$ 
11: else
12:  return  $\mathbf{x}_{C_{12}}$ 
13: end if

```

**Function** bisec( $\mathbf{v}$ ,  $s_1$ ,  $s_2$ ,  $T_1$ ,  $T_3$ )

```

1: Initialize  $up$ ,  $low$  and  $tol$ 
2: while  $up - low > tol$  do
3:    $\hat{\lambda} = (low + up)/2$ 
4:   if (15) has a solution  $\hat{\eta}$  given  $v^{\hat{\lambda}}$  then
5:     calculate  $\hat{s}_1$  using  $\hat{\eta}$  and  $\hat{\lambda}$ .
6:     if  $\hat{s}_1 \leq s_1$  then
7:        $up = \hat{\lambda}$ 
8:     else
9:        $low = \hat{\lambda}$ 
10:    end if
11:  else
12:     $up = \hat{\lambda}$ 
13:  end if
14: end while
15:  $\lambda^* = up$ 
16: Solve (15) to get  $\eta^*$ 
17: Calculate  $(\mathbf{x}^*)^{T_1}$  from  $\lambda^*$  and  $\eta^*$ .
18: return  $(\mathbf{x}^*)^{T_1}$ 

```

---

**Algorithm 6** ADMM (Boyd et al., 2011) for (8)

---

**Input:**  $\mathbf{v}$ ,  $s_1$ ,  $s_2$

**Output:** an optimal solution  $\mathbf{x}$  to (8)

**Initialize:**  $\mathbf{x}_0$ ,  $\mathbf{u}_0$ ,  $\mathbf{w}_0$ ,  $\boldsymbol{\lambda}_0$ ,  $\boldsymbol{\eta}_0$ ,  $t = 0$ ,  $\rho > 0$

**repeat**

$t = t + 1$

$\mathbf{x}_t = \frac{1}{1+2\rho} (\mathbf{v} + \rho(\mathbf{u}_{t-1} + \boldsymbol{\lambda}_{t-1} + \mathbf{w}_{t-1} + \boldsymbol{\eta}_{t-1}))$

$\mathbf{w}_t = \mathcal{P}_G^{s_2}(\mathbf{x}_t - \boldsymbol{\eta}_{t-1})$

$\mathbf{u}_t = \mathcal{P}_1^{s_1}(\mathbf{x}_t - \boldsymbol{\lambda}_{t-1})$

$\boldsymbol{\lambda}_t = \boldsymbol{\lambda}_{t-1} + \mathbf{u}_t - \mathbf{x}_t$ ,  $\boldsymbol{\eta}_t = \boldsymbol{\eta}_{t-1} + \mathbf{w}_t - \mathbf{x}_t$ .

**until** Converge

**return**  $\mathbf{x}_t$

---

---

**Algorithm 7** Dykstra's Algorithm (Combettes & Pesquet, 2010) for (8)

---

**Input:**  $\mathbf{v}$ ,  $s_1$ ,  $s_2$

**Output:** an optimal solution  $x$  to (8)

**Initialize:**  $\mathbf{x}_0 = \mathbf{v}$ ,  $\mathbf{p}_0 = \mathbf{0}$ ,  $\mathbf{q}_0 = \mathbf{0}$ ,  $t = 0$

**repeat**

$t = t + 1$

$\mathbf{y}_{t-1} = \mathcal{P}_G^{s_2}(\mathbf{x}_{t-1} + \mathbf{p}_{t-1})$

$\mathbf{p}_t = \mathbf{x}_{t-1} + \mathbf{p}_{t-1} - \mathbf{y}_{t-1}$

$\mathbf{x}_t = \mathcal{P}_1^{s_1}(\mathbf{y}_{t-1} + \mathbf{q}_{t-1})$

$\mathbf{q}_t = \mathbf{y}_{t-1} + \mathbf{q}_{t-1} - \mathbf{x}_t$

**until** Converge

**return**  $\mathbf{x}_t$

---
